# Supplementary material
Source: PubMed Central journal article supplement (PMC2830836)
Supplement: supp_M900223-MCP200_Supplementary_Material_Rudnick_050509.pdf [file supp_M900223-MCP200_Supplementary_Material_Rudnick_050509.pdf]

# Supplementary Material

to

## Performance Metrics for Evaluating Liquid Chromatography-Tandem Mass Spectrometry Systems in Shotgun Proteomics

Rudnick et al.

- A. SOP for the preparation of the yeast protein lysate
- B. Digestion and characterization of the yeast protein lysate
- C. SOPs for CPTAC Network Study 5
- D. SOPs for CPTAC Network Study 6

## A. Preparation of the yeast protein lysate

### Reagents:

- YPD (Bio101 system, Cat# 4001-032, Lot# 4001-032-101401)
- Kanamycin Sulfate (Shelton Scientific Inc, Cat# IBU2120, Lot# 6I1150)
- Trichloroacetic Acid (TCA) (VWR (100% W/V), Cat# 3372-2, Lot# 7022)
- Acetone (Burdick & Jackson, Inc, Cat# AH010-4, Lot# 10071741)
- Yeast stock BY4741 (MATa leu2D0 met15D0 ura3D0 his3D1) (Open Biosystems, Cat# YSC1048-645440)

### Protocol

All steps of this protocol were completed by Boston Biochem (Cambridge, MA), the commercial concern that produced the lysate.

- Yeast from glycerol stock were struck out onto a YPD plate and incubated overnight at 30°C. The plate contained colonies of uniform shape, size and color.
- Inoculated 500 ml of YPD (supplemented with 25 µg/ml Kanamycin) with yeast from patch of cells (not an individual colony) and grown overnight at 30°C with shaking.
- Diluted 100 ml of overnight culture into 10 L of YPDKan in a fermentor and grown at 30°C. Initial OD600 = 0.21. Growth was done with aeration at 10K CC/min, agitation at 30 rpm.
- The OD600 was monitored every 30 minutes using a spectrophotometer.
- When the culture reached OD600 = 0.93 (~ 5 hours), the yeast was harvested using a Sharples continuous-flow centrifuge (over 30K rpm).
- Total pellet wet weight obtained = 5.4 g.
- The cell pellet was resuspended and washed 3 times in 150 ml ice-cold sterile water to remove residual media. The washes were monitored at OD600 until absorbance was at baseline.
- The washed cell pellet was then resuspended in 160 ml of ice-cold sterile water. The suspension was split into two sterile tubes and 80 ml of ice-cold 20% TCA was added to each (final TCA concentration is 10%).
- Each tube was incubated with agitation at 4°C for 1 hour to facilitate cell lysis.
- The precipitate was collected by centrifugation at 18.3K rpm (50,000g) for 30 minutes.
- Each pellet was washed with 160 ml ice-cold 90% acetone. The pellet was recovered by centrifugation at 18.3K rpm (50,000g) for 30 minutes.
- The acetone wash and centrifugation were repeated and all liquid removed.
- The pellet was flash-frozen in liquid nitrogen, transferred to a sterile 50 ml conical tube, and lyophilized.
- The lyophilized pellet was stored at -80°C or dry ice (as required).

## C. Digestion and characterization of the yeast protein lysate

To prepare the material for LC-MS analysis, the solubilized lysate was digested with trypsin using the procedure of Piening *et al.*, (J. Proteome. Res. 2006, 5, 1527). In brief, the yeast protein (approximately 1 mg/ml in 50 mM ammonium bicarbonate, 8 M urea at pH 8.0), was reduced and denatured at 60 °C for 1 h following the addition of dithiothreitol at a concentration of 15 mM. Next, the proteins were alkylated by adding iodoacetamide to a concentration of 25 mM. After quenching the reaction by the addition of dithiothreitol (DTT) to a concentration of 50 mM, the solution was diluted 8-fold with 50 mM aqueous ammonium bicarbonate. Digestion with trypsin was carried out at 37 °C for approximately 18 h. The digestion was halted by the addition of acetic acid to a concentration of 1% and the sample was stored at -80 °C prior to analysis. All reagents used, including trypsin, were from Sigma and used without further purification.

For LC-MS analysis, varying amounts of the trypsin digest, corresponding to approximately 5, 25 and 50 pmol of total yeast protein, were injected onto an Atlantis dC18 column (3 µm particle size, 300 µm x 150 mm; Waters, Milford, MA). Elution was accomplished with a 2 h gradient from 3 % to 40 % acetonitrile in an aqueous solution of 0.1 % formic acid using a flow rate of 15 µl/min. For the LC-MS analysis, a Waters nanoAcquity LC was coupled to a Waters QToF Premier mass spectrometer. Mass spectra were obtained from m/z 400 to m/z 1600 with a scan time of 1 s. A 300 µM solution of glu-fibrinopeptide in a 50 % acetonitrile, 50 % water was sprayed at 2 µl/min, orthogonally to the LC effluent spray, for lock-mass calibration.

Prior to data analysis, the Waters RAW file was converted to mzXML format using *massWolf* (<http://tools.proteomecenter.org/MassWolf.php>). For feature detection/analysis of the LC-MS TIC, *msInspect* (build # 4603, <http://proteomics.fhcrc.org/CPL/msinspect.html>) was used. To count the total number of features, the output file generated by *msInspect* was imported into Excel and the total number of entries was used to determine the total number of features detected.

LC-MS/MS analysis of the digestion was performed on a Thermo LTQ using the original 95 min gradient as described in the SOP optimization. The results were searched using the MyriMatch algorithm and the results run through the IDPicker algorithm to determine the total confidently identified spectra, peptides, proteins and most parsimonious protein groups.

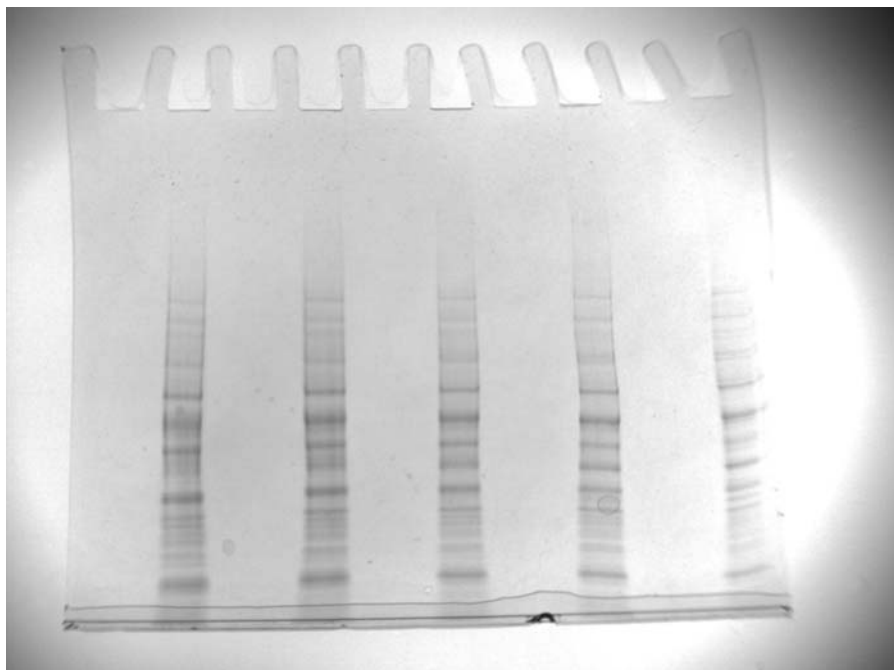

**Figure 1** 1D-PAGE results from the analysis of the yeast lysate. The sample loading for the 5 lanes, from left to right, was approximately 12.5  $\mu\text{g}$ , 10  $\mu\text{g}$ , 7.5  $\mu\text{g}$ , 5  $\mu\text{g}$ , and 2.5  $\mu\text{g}$  total protein

**Table 1** Total number of LC-MS featured detected at various sample loads of the trypsin digest of the yeast lysate. The number of features was determined using *msInspect*.

| <b>Total Protein (pre-digestion) on Column</b> | <b>Number of Features Detected</b> |
|------------------------------------------------|------------------------------------|
| 5 pmol                                         | 303                                |
| 25 pmol                                        | 3588                               |
| 50 pmol                                        | 7924                               |

## D. SOPs for CPTAC Network Study 5

The CPTAC Unbiased Discovery Working Group was tasked to design a renewable, standardized set of reference samples for benchmarking LC-MS/MS platforms with respect to performance characteristics relevant to shotgun proteomics-based biomarker discovery. The first CPTAC-wide experiment of this working group was to test a yeast lysate spiked with a human protein mix. Due to complications with the human protein mix that we were to use, we have modified this experiment to include only a single protein, bovine serum albumin (BSA). This initial spiked sample will provide a means for comparing performance of LC/MS/MS platforms amongst the CPTAC participants. In the future, our goal is to develop a performance standard that will provide a means for comparing performance of LC/MS/MS platforms i) as a quality control over time, ii) after the addition of new technologies to evaluate their effectiveness compared to historic data, or iii) between laboratories to inform optimization and troubleshooting.

The experiment has been designed to meet two primary goals. First, the study will provide an assessment of run-to-run and lab-to-lab variability for a complex mixture of proteins. Also, the study will provide a measure of the sensitivity of a mass-spec platform in a yeast lysate. This will be achieved by calculating the power required to detect a two-fold difference for the overall sensitivity of the platform for a given decade of protein abundance.

This proposed standard operating procedure (SOP) was developed after initial testing of several yeast lysate samples at Vanderbilt University. After an initial “dress rehearsal” run, the SOP was re-evaluated and refined to achieve better compliance as well as standardize new parameters that may have led to variance in the initial dress rehearsal runs.

### Study Samples:

The yeast lysate and BSA was digested using RapiGest as denaturant and iodoacetamide as alkylating reagent. A 20 h digest was performed at 37 °C with proteomics-grade trypsin. After digestion, both samples were lyophilized and resuspended in 0.1% formic acid in water. The yeast sample has been diluted to a total protein concentration of 60 ng/μL. Therefore, the yeast samples are ready to be analyzed without additional dilution. Both yeast samples (Sample 3-A and 3-B) contains approximately 100 μL.

Table 1 contains descriptive and concentration information on the study samples:

**Table 2** NCI CPTAC Study 5 samples

| Sample     | Description                  | [Total Yeast Protein] | [BSA]      |
|------------|------------------------------|-----------------------|------------|
| Sample 3-A | unspiked digested yeast      | 60 ng/μL              | 0          |
| Sample 3-B | BSA digest in digested yeast | 60 ng/μL              | 10 fmol/μL |
| Sample 1-B | digested NCI-20 protein mix  | 0                     | 0          |

For Study 5, 1 vial of digested, unspiked yeast (Sample 3-A) and 1 vial of digested yeast spiked with a BSA digest (Sample 3-B) was sent to study participants along with 1 vial of digested NCI-20 (Sample 1B), which will be used as a QC sample for the study. Prior to analysis, **Sample 1B should be diluted 150-fold with 0.1% formic acid in water.**

Below are checklists that outline the HPLC and mass spectrometry parameters of this SOP for both a Thermo LTQ and Thermo Orbitrap. The run order of samples follow the checklists. Participants will adhere as closely to these guidelines as possible with the understanding that not all labs are able to utilize a precolumn and,

depending upon their nanospray set up, these chromatographic dimensions (length only) may change somewhat. Derivations from the protocol in this regard will be recorded. All participants should use the Jupiter C18 resin sent to their respective labs.

If possible, participants should pack their columns at 1000 PSI in methanol and then finish packing with the HPLC at 50:50 0.1% formic:acetonitrile on the HPLC for 30 min prior to cutting back the columns to their final dimensions. Please note any discrepancies from this procedure. The column should also be conditioned prior to use with an injection of a concentrated protein digest (such as a BSA digest) followed by several injections of a less concentrated digest. Several blank runs should be performed after conditioning to eliminate carryover of the conditioning digest into the first blank of the study.

It is recommended that each lab run a preliminary test run with the SOP methods and check the parameters recorded in the data file against the check lists provided. This will help to find errors in tune file parameters that can sometimes be tricky to spot.

## Study 5 LTQ SOP Checklist

| Source/APstack parameters |                                                     |  |              | Notes |
|---------------------------|-----------------------------------------------------|--|--------------|-------|
| <input type="checkbox"/>  | Capillary temperature                               |  | 150 ± 25°C   |       |
| <input type="checkbox"/>  | Capillary voltage                                   |  | 48 ± 20 V    |       |
| <input type="checkbox"/>  | Tube Lens                                           |  | 100 ± 25 V   |       |
| <input type="checkbox"/>  | Source voltage                                      |  | 2.0 ± 0.5 kV |       |
| Tune File Parameters      |                                                     |  |              | Notes |
| <input type="checkbox"/>  | Ion Trap Full Microscans                            |  | 1            |       |
| <input type="checkbox"/>  | Ion Trap MSn Microscans                             |  | 1            |       |
| <input type="checkbox"/>  | Ion Trap Full Max Ion Time                          |  | 100          |       |
| <input type="checkbox"/>  | Ion Trap MSn Max Ion Time                           |  | 100          |       |
| <input type="checkbox"/>  | Ion Trap Full AGC Target                            |  | 30,000       |       |
| <input type="checkbox"/>  | Ion Trap MSn AGC Target                             |  | 10,000       |       |
| MS detector               |                                                     |  |              | Notes |
| <input type="checkbox"/>  | Acquire time (min)                                  |  | 184          |       |
| <input type="checkbox"/>  | Start delay (min)                                   |  | 15           |       |
| <input type="checkbox"/>  | Segments                                            |  | 1            |       |
| <input type="checkbox"/>  | Scan Events                                         |  | 9            |       |
| <input type="checkbox"/>  | Scan Range for Event 1                              |  | m/z 300-2000 |       |
| <input type="checkbox"/>  | Mass range for all events                           |  | Normal       |       |
| <input type="checkbox"/>  | Scan Rate for all events                            |  | Normal       |       |
| <input type="checkbox"/>  | Polarity for all events                             |  | Positive     |       |
| <input type="checkbox"/>  | Data type for MS scan                               |  | Centroid     |       |
| <input type="checkbox"/>  | Data Type for MSn Scan                              |  | Centroid     |       |
| <input type="checkbox"/>  | Additional microscans                               |  | 0            |       |
| Dynamic Exclusion         |                                                     |  |              | Notes |
| <input type="checkbox"/>  | Repeat Count                                        |  | 1            |       |
| <input type="checkbox"/>  | Repeat duration (s)                                 |  | 0            |       |
| <input type="checkbox"/>  | Exclusion list size                                 |  | 150          |       |
| <input type="checkbox"/>  | Exclusion duration (s)                              |  | 60           |       |
| <input type="checkbox"/>  | Exclusion mass width                                |  | By mass      |       |
| <input type="checkbox"/>  | Exclusion mass width (low)                          |  | 1.0          |       |
| <input type="checkbox"/>  | Exclusion mass width (high)                         |  | 3.5          |       |
| <input type="checkbox"/>  | Early expiration is NOT used                        |  |              |       |
| Scan Event                |                                                     |  |              | Notes |
| <input type="checkbox"/>  | Charge state screening and Rejection is NOT enabled |  |              |       |
| <input type="checkbox"/>  | Minimum MS signal Threshold for MS2 trigger         |  | 500          |       |
| <input type="checkbox"/>  | Mass determined from scan event                     |  | 1            |       |

|                                           |                          |                                                                                                       |                                        |       |
|-------------------------------------------|--------------------------|-------------------------------------------------------------------------------------------------------|----------------------------------------|-------|
|                                           | <input type="checkbox"/> | Activation type                                                                                       | CID                                    |       |
|                                           | <input type="checkbox"/> | Default charge state                                                                                  | 4                                      |       |
|                                           | <input type="checkbox"/> | Isolation width (m/z)                                                                                 | 2.0                                    |       |
|                                           | <input type="checkbox"/> | Normalized collision energy                                                                           | 28                                     |       |
|                                           | <input type="checkbox"/> | Activation Q                                                                                          | 0.250                                  |       |
|                                           | <input type="checkbox"/> | Activation time (s)                                                                                   | 30.0                                   |       |
|                                           | <input type="checkbox"/> | Mass lists and global mass lists NOT used                                                             |                                        |       |
|                                           | <input type="checkbox"/> | For each Current Scan Event, the Nth most intense ion is set at 8-1 for scan events 2-9, respectively |                                        |       |
| <b>HPLC Parameters and chromatography</b> |                          |                                                                                                       |                                        | Notes |
|                                           | <input type="checkbox"/> | Autosampler temperature                                                                               | 10C                                    |       |
|                                           | <input type="checkbox"/> | Column dimensions                                                                                     | 11-13 cm x 100 $\mu$ m*                |       |
|                                           | <input type="checkbox"/> | Precolumn dimensions                                                                                  | 2-4 cm x 100 $\mu$ m**                 |       |
|                                           | <input type="checkbox"/> | Column packing material                                                                               | Jupiter C18                            |       |
|                                           | <input type="checkbox"/> | Column temperature                                                                                    | Room temperature                       |       |
|                                           | <input type="checkbox"/> | Mobile phase A                                                                                        | 0.1% (v/v) formic acid in water        |       |
|                                           | <input type="checkbox"/> | Mobile phase B                                                                                        | 0.1% (v/v) formic acid in acetonitrile |       |
|                                           | <input type="checkbox"/> | Injection volume                                                                                      | 2.0 $\mu$ L                            |       |
|                                           | <input type="checkbox"/> | Injection loop (or needle) volume                                                                     | 8.0 $\mu$ L***                         |       |
|                                           | <input type="checkbox"/> | Flow rate for gradient                                                                                | 600 +/- 200 nL/min at column tip       |       |
|                                           | <input type="checkbox"/> | Flow rate for loading phase                                                                           | As per individual lab protocol         |       |
|                                           | <input type="checkbox"/> | 184 min HPLC gradient for yeast samples                                                               | As per attached table                  |       |
|                                           | <input type="checkbox"/> | 95 min HPLC gradient for NCI20 and blanks samples                                                     | As per attached table                  |       |

\* Column length may vary depending upon the individual nanospray set up, but inner diameter should remain the same.

\*\* Precolumn is optional depending upon individual laboratory expertise, but should be used if at all possible. Column length may vary depending upon the individual nanospray set up, but inner diameter should remain the same.

\*\*\* If not possible to achieve, use same set up as dress rehearsal and make note of change.



## HPLC Gradient with “vented” column

| Time  | %A  | %B | Flow               | Notes |
|-------|-----|----|--------------------|-------|
| 0     | 100 | 0  | To Waste*          |       |
| 0.01  | 100 | 0  | To Waste           |       |
| 10    | 100 | 0  | To Waste           |       |
| 15    | 98  | 2  | To Waste           |       |
| 15.01 | 98  | 2  | To column (source) |       |
| 135   | 60  | 40 | To column (source) |       |
| 150   | 10  | 90 | To column (source) |       |
| 155   | 10  | 90 | To column (source) |       |
| 159   | 10  | 90 | To column (source) |       |
| 164   | 95  | 5  | To column (source) |       |
| 169   | 100 | 0  | To column (source) |       |
| 184   | 100 | 0  | To column (source) |       |

\* If using a precolumn, the flow should be directed to waste if possible.

## 95 min HPLC Gradient with “vented” column for blanks and NCI-20

| Time  | %A  | %B | Flow               | Notes |
|-------|-----|----|--------------------|-------|
| 0     | 100 | 0  | To Waste*          |       |
| 0.01  | 100 | 0  | To Waste           |       |
| 10    | 100 | 0  | To Waste           |       |
| 15    | 98  | 2  | To Waste           |       |
| 15.01 | 98  | 2  | To column (source) |       |
| 50    | 75  | 25 | To column (source) |       |
| 65    | 10  | 90 | To column (source) |       |
| 70    | 10  | 90 | To column (source) |       |
| 74    | 10  | 90 | To column (source) |       |
| 75    | 95  | 5  | To column (source) |       |
| 80    | 100 | 0  | To column (source) |       |
| 95    | 100 | 0  | To column (source) |       |

\*If using a precolumn, the flow should be directed to waste.

Run order:

| <b>Run number</b> | <b>Sample</b>                  | <b>Gradient</b>  |
|-------------------|--------------------------------|------------------|
| 1                 | <b>Sample 1-B-NCI20</b>        | 95 min gradient  |
| 2                 | Wash*                          |                  |
| 3                 | Blank                          | 95 min gradient  |
| 4                 | <b>Sample 3-A-Yeast</b>        | 184 min gradient |
| 5                 | Wash*                          |                  |
| 6                 | Blank                          | 95 min gradient  |
| 7                 | <b>Sample 3-A-Yeast</b>        | 184 min gradient |
| 8                 | Wash*                          |                  |
| 9                 | Blank                          | 95 min gradient  |
| 10                | <b>Sample 3-A-Yeast</b>        | 184 min gradient |
| 11                | Wash*                          |                  |
| 12                | Blank                          | 95 min gradient  |
| 13                | <b>Sample 1-B-NCI20</b>        | 95 min gradient  |
| 14                | Wash*                          |                  |
| 15                | Blank                          | 95 min gradient  |
| 16                | <b>Sample 3-B-Spiked Yeast</b> | 184 min gradient |
| 17                | Wash*                          |                  |
| 18                | Blank                          | 95 min gradient  |
| 19                | <b>Sample 3-B-Spiked Yeast</b> | 184 min gradient |
| 20                | Wash*                          |                  |
| 21                | Blank                          | 95 min gradient  |
| 22                | <b>Sample 3-B-Spiked Yeast</b> | 184 min gradient |
| 23                | Wash*                          |                  |
| 24                | Blank                          | 95 min gradient  |
| 25                | <b>Sample 1-B-NCI20</b>        | 95 min gradient  |
| 26                | Wash*                          |                  |
| 27                | Blank                          | 95 min gradient  |
| 28                | <b>Sample 3-A-Yeast</b>        | 184 min gradient |
| 29                | Wash*                          |                  |
| 30                | Blank                          | 95 min gradient  |
| 31                | <b>Sample 3-A-Yeast</b>        | 184 min gradient |
| 32                | Wash*                          |                  |
| 33                | Blank                          | 95 min gradient  |
| 34                | <b>Sample 3-A-Yeast</b>        | 184 min gradient |
| 35                | Wash*                          |                  |
| 36                | Blank                          | 95 min gradient  |
| 37                | <b>Sample 1-B-NCI20</b>        | 95 min gradient  |
| 38                | Wash*                          |                  |
| 39                | Blank                          | 95 min gradient  |
| 40                | <b>Sample 3-B-Spiked Yeast</b> | 184 min gradient |
| 41                | Wash*                          |                  |
| 42                | Blank                          | 95 min gradient  |
| 43                | <b>Sample 3-B-Spiked Yeast</b> | 184 min gradient |
| 44                | Wash*                          |                  |
| 45                | Blank                          | 95 min gradient  |
| 46                | <b>Sample 3-B-Spiked Yeast</b> | 184 min gradient |
| 47                | Wash*                          |                  |
| 48                | Blank                          | 95 min gradient  |
| 49                | <b>Sample 1-B-NCI20</b>        | 95 min gradient  |

\* As per individual laboratory protocol

## Study 5 Orbitrap SOP Checklist

| Source/APstack parameters      |                                          |  |              | Notes |
|--------------------------------|------------------------------------------|--|--------------|-------|
| <input type="checkbox"/>       | Capillary temperature                    |  | 150 ± 25°C   |       |
| <input type="checkbox"/>       | Capillary voltage                        |  | 48 ± 20 V    |       |
| <input type="checkbox"/>       | Tube Lens                                |  | 100 ± 25 V   |       |
| <input type="checkbox"/>       | Source voltage                           |  | 2.0 ± 0.5 kV |       |
| Tune File Parameters           |                                          |  |              | Notes |
| <input type="checkbox"/>       | FTMS Full Microscans                     |  | 1            |       |
| <input type="checkbox"/>       | Ion Trap MSn Microscans                  |  | 1            |       |
| <input type="checkbox"/>       | FTMS Full Max Ion Time                   |  | 1000         |       |
| <input type="checkbox"/>       | Ion Trap MSn Max Ion Time                |  | 100          |       |
| <input type="checkbox"/>       | FTMS Full AGC Target                     |  | 1,000,000    |       |
| <input type="checkbox"/>       | Ion Trap MSn AGC Target                  |  | 10,000       |       |
| MS detector                    |                                          |  |              | Notes |
| <input type="checkbox"/>       | Acquire time (min)                       |  | 184          |       |
| <input type="checkbox"/>       | Start delay (min)                        |  | 15           |       |
| <input type="checkbox"/>       | Segments                                 |  | 1            |       |
| <input type="checkbox"/>       | Scan Events                              |  | 9            |       |
| <input type="checkbox"/>       | Scan Range for Event 1                   |  | m/z 300-2000 |       |
| <input type="checkbox"/>       | Mass range for all events                |  | Normal       |       |
| <input type="checkbox"/>       | Scan Rate for all events                 |  | Normal       |       |
| <input type="checkbox"/>       | Polarity for all events                  |  | Positive     |       |
| <input type="checkbox"/>       | Data type for MS scan                    |  | Profile      |       |
| <input type="checkbox"/>       | Data Type for MSn Scan                   |  | Centroid     |       |
| <input type="checkbox"/>       | Additional microscans                    |  | 0            |       |
| <input type="checkbox"/>       | Resolution of MS scan                    |  | 60,000       |       |
| <input type="checkbox"/>       | Lock mass is NOT enabled                 |  |              |       |
| Dynamic Exclusion              |                                          |  |              | Notes |
| <input type="checkbox"/>       | Repeat Count                             |  | 1            |       |
| <input type="checkbox"/>       | Repeat duration (s)                      |  | 0            |       |
| <input type="checkbox"/>       | Exclusion list size                      |  | 150          |       |
| <input type="checkbox"/>       | Exclusion duration (s)                   |  | 60           |       |
| <input type="checkbox"/>       | Exclusion mass width                     |  | By mass      |       |
| <input type="checkbox"/>       | Exclusion mass width (low)               |  | 0.6          |       |
| <input type="checkbox"/>       | Exclusion mass width (high)              |  | 0.6          |       |
| <input type="checkbox"/>       | Early expiration is NOT used             |  |              |       |
| Global Data-Dependent Settings |                                          |  |              | Notes |
| <input type="checkbox"/>       | Charge state screening enabled           |  |              |       |
| <input type="checkbox"/>       | Monoisotopic precursor selection enabled |  |              |       |

|                                           |                          |                                                                                                       |                                        |       |
|-------------------------------------------|--------------------------|-------------------------------------------------------------------------------------------------------|----------------------------------------|-------|
|                                           | <input type="checkbox"/> | Non-peptide monoisotopic recognition enabled                                                          |                                        |       |
|                                           | <input type="checkbox"/> | Charge state +1 rejected                                                                              |                                        |       |
|                                           | <input type="checkbox"/> | Unassigned charge state rejected                                                                      |                                        |       |
| <b>Scan Event</b>                         |                          |                                                                                                       |                                        | Notes |
|                                           | <input type="checkbox"/> | Minimum MS signal Threshold for MS2 trigger                                                           | 500                                    |       |
|                                           | <input type="checkbox"/> | Mass determined from scan event                                                                       | 1                                      |       |
|                                           | <input type="checkbox"/> | Activation type                                                                                       | CID                                    |       |
|                                           | <input type="checkbox"/> | Default charge state                                                                                  | 4                                      |       |
|                                           | <input type="checkbox"/> | Isolation width (m/z)                                                                                 | 2.0                                    |       |
|                                           | <input type="checkbox"/> | Normalized collision energy                                                                           | 28                                     |       |
|                                           | <input type="checkbox"/> | Activation Q                                                                                          | 0.250                                  |       |
|                                           | <input type="checkbox"/> | Activation time (s)                                                                                   | 30.0                                   |       |
|                                           | <input type="checkbox"/> | Mass lists and global mass lists NOT used                                                             |                                        |       |
|                                           | <input type="checkbox"/> | For each Current Scan Event, the Nth most intense ion is set at 8-1 for scan events 2-9, respectively |                                        |       |
| <b>HPLC Parameters and chromatography</b> |                          |                                                                                                       |                                        | Notes |
|                                           | <input type="checkbox"/> | Autosampler temperature                                                                               | 10C                                    |       |
|                                           | <input type="checkbox"/> | Column dimensions                                                                                     | 11-13 cm x 100 $\mu$ m*                |       |
|                                           | <input type="checkbox"/> | Precolumn dimensions                                                                                  | 2-4 cm x 100 $\mu$ m**                 |       |
|                                           | <input type="checkbox"/> | Column packing material                                                                               | Jupiter C18                            |       |
|                                           | <input type="checkbox"/> | Column temperature                                                                                    | Room temperature                       |       |
|                                           | <input type="checkbox"/> | Mobile phase A                                                                                        | 0.1% (v/v) formic acid in water        |       |
|                                           | <input type="checkbox"/> | Mobile phase B                                                                                        | 0.1% (v/v) formic acid in acetonitrile |       |
|                                           | <input type="checkbox"/> | Injection volume                                                                                      | 2.0 $\mu$ L                            |       |
|                                           | <input type="checkbox"/> | Injection loop (or needle) volume                                                                     | 8.0 $\mu$ L***                         |       |
|                                           | <input type="checkbox"/> | Flow rate for gradient                                                                                | 600 +/- 200 nL/min at column tip       |       |
|                                           | <input type="checkbox"/> | Flow rate for loading phase                                                                           | As per individual lab protocol         |       |
|                                           | <input type="checkbox"/> | 184 min HPLC gradient for yeast samples                                                               | As per attached table                  |       |
|                                           | <input type="checkbox"/> | 95 min HPLC gradient for NCI20 and blanks samples                                                     | As per attached table                  |       |

\* Column length may vary depending upon the individual nanospray set up, but inner diameter should remain the same.

\*\* Precolumn is optional depending upon individual laboratory expertise, but should be used if at all possible. Column length may vary depending upon the individual nanospray set up, but inner diameter should remain the same.

\*\*\* If not possible, use same set up as dress rehearsal and make note of change.

| <b>184 min HPLC Gradient with “vented” column for yeast samples</b> |     |    |                    |       |
|---------------------------------------------------------------------|-----|----|--------------------|-------|
| Time                                                                | %A  | %B | Flow               | Notes |
| 0                                                                   | 100 | 0  | To Waste*          |       |
| 0.01                                                                | 100 | 0  | To Waste           |       |
| 10                                                                  | 100 | 0  | To Waste           |       |
| 15                                                                  | 98  | 2  | To Waste           |       |
| 15.01                                                               | 98  | 2  | To column (source) |       |
| 135                                                                 | 60  | 40 | To column (source) |       |
| 150                                                                 | 10  | 90 | To column (source) |       |
| 155                                                                 | 10  | 90 | To column (source) |       |
| 159                                                                 | 10  | 90 | To column (source) |       |
| 164                                                                 | 95  | 5  | To column (source) |       |
| 169                                                                 | 100 | 0  | To column (source) |       |
| 184                                                                 | 100 | 0  | To column (source) |       |

\*If using a precolumn, the flow should be directed to waste.

| <b>95 min HPLC Gradient with “vented” column for blanks and NCI-20</b> |     |    |                    |       |
|------------------------------------------------------------------------|-----|----|--------------------|-------|
| Time                                                                   | %A  | %B | Flow               | Notes |
| 0                                                                      | 100 | 0  | To Waste*          |       |
| 0.01                                                                   | 100 | 0  | To Waste           |       |
| 10                                                                     | 100 | 0  | To Waste           |       |
| 15                                                                     | 98  | 2  | To Waste           |       |
| 15.01                                                                  | 98  | 2  | To column (source) |       |
| 50                                                                     | 75  | 25 | To column (source) |       |
| 65                                                                     | 10  | 90 | To column (source) |       |
| 70                                                                     | 10  | 90 | To column (source) |       |
| 74                                                                     | 10  | 90 | To column (source) |       |
| 75                                                                     | 95  | 5  | To column (source) |       |
| 80                                                                     | 100 | 0  | To column (source) |       |
| 95                                                                     | 100 | 0  | To column (source) |       |

\*If using a precolumn, the flow should be directed to waste.

Run order:

| <b>Run Number</b> | <b>Sample</b>                  | <b>Gradient</b>  |
|-------------------|--------------------------------|------------------|
| 1                 | <b>Sample 1-B-NCI20</b>        | 95 min gradient  |
| 2                 | Wash*                          |                  |
| 3                 | Blank                          | 95 min gradient  |
| 4                 | <b>Sample 3-A-Yeast</b>        | 184 min gradient |
| 5                 | Wash*                          |                  |
| 6                 | Blank                          | 95 min gradient  |
| 7                 | <b>Sample 3-A-Yeast</b>        | 184 min gradient |
| 8                 | Wash*                          |                  |
| 9                 | Blank                          | 95 min gradient  |
| 10                | <b>Sample 3-A-Yeast</b>        | 184 min gradient |
| 11                | Wash*                          |                  |
| 12                | Blank                          | 95 min gradient  |
| 13                | <b>Sample 1-B-NCI20</b>        | 95 min gradient  |
| 14                | Wash*                          |                  |
| 15                | Blank                          | 95 min gradient  |
| 16                | <b>Sample 3-B-Spiked Yeast</b> | 184 min gradient |
| 17                | Wash*                          |                  |
| 18                | Blank                          | 95 min gradient  |
| 19                | <b>Sample 3-B-Spiked Yeast</b> | 184 min gradient |
| 20                | Wash*                          |                  |
| 21                | Blank                          | 95 min gradient  |
| 22                | <b>Sample 3-B-Spiked Yeast</b> | 184 min gradient |
| 23                | Wash*                          |                  |
| 24                | Blank                          | 95 min gradient  |
| 25                | <b>Sample 1-B-NCI20</b>        | 95 min gradient  |
| 26                | Wash*                          |                  |
| 27                | Blank                          | 95 min gradient  |
| 28                | <b>Sample 3-A-Yeast</b>        | 184 min gradient |
| 29                | Wash*                          |                  |
| 30                | Blank                          | 95 min gradient  |
| 31                | <b>Sample 3-A-Yeast</b>        | 184 min gradient |
| 32                | Wash*                          |                  |
| 33                | Blank                          | 95 min gradient  |
| 34                | <b>Sample 3-A-Yeast</b>        | 184 min gradient |
| 35                | Wash*                          |                  |
| 36                | Blank                          | 95 min gradient  |
| 37                | <b>Sample 1-B-NCI20</b>        | 95 min gradient  |
| 38                | Wash*                          |                  |
| 39                | Blank                          | 95 min gradient  |
| 40                | <b>Sample 3-B-Spiked Yeast</b> | 184 min gradient |
| 41                | Wash*                          |                  |
| 42                | Blank                          | 95 min gradient  |
| 43                | <b>Sample 3-B-Spiked Yeast</b> | 184 min gradient |
| 44                | Wash*                          |                  |
| 45                | Blank                          | 95 min gradient  |
| 46                | <b>Sample 3-B-Spiked Yeast</b> | 184 min gradient |
| 47                | Wash*                          |                  |
| 48                | Blank                          | 95 min gradient  |
| 49                | <b>Sample 1-B-NCI20</b>        | 95 min gradient  |

\* As per individual laboratory protocol

## Upload Instructions for Study5: Unbiased Discovery, Yeast + BSA Experiment

- 1.) Browse to <https://chemdata.nist.gov/cptac/> (ignore the security warning and click OK. A signed third party certificate is in the process of being purchased to prevent these warnings in the future).
- 2.) Enter your 'log-in' name and password. (Sent to each contact in a separate e-mail.)
- 3.) Select '**Study5**' from the selector at the top of the navigation bar. (Do not use the Study3 section for these data files).
- 4.) Find your site and the instrument for which you are uploading data on the navigation bar. Click on 'Yeast + BSA Experiment' under that instrument.
- 5.) Follow the instructions in the box for Step 3. All data files and any annotation forms should be first copied to a **single directory** for upload. Please include the completed SOP checklist (above) in that directory. Uploading multiple directories or replicate experiments is allowed.
- 6.) Enter the name of your SOP contact in the box at Step 4. Click 'Sign.' The 'Upload' hyperlink at Step 5 is now active.
- 7.) Click on 'Upload' to launch Tranche. This requires Java JRE to be installed. Browse to the directory you wish to upload to begin the data transfer.
- 8.) Once you see a box displaying "*Upload Complete. Please check NIST website*" your upload has completed. You do not have to leave you web browser open for the upload to continue. You can view all uploads by clicking 'Download Data' from the navigation bar.

### Timeline for Study 5

| Task                                  | Duration | Start Date | End Date   |
|---------------------------------------|----------|------------|------------|
| NIST sends out samples for full study | 2 days   | 10/4/2007  | 10/5/2007  |
| Labs perform full study               | 14 days  | 10/8/2007  | 10/24/2007 |
| Labs upload data to Tranche           | 1 day    | 10/25/2007 | 10/25/2007 |
| Yeast data is analyzed                | 30 days  | 10/29/2007 | 12/7/2007  |
| Interim results reported to PCC       | 1 day    | 10/23/2007 | 10/23/2007 |
| Yeast results reported to PCC         | 1 day    | 12/18/2007 | 12/18/2007 |

## E. SOPs for CPTAC Study 6

### NCI CPTAC Study 5 samples

| Sample       | Description                                   | [Total Yeast Protein] | [Sigma48]    |
|--------------|-----------------------------------------------|-----------------------|--------------|
| Sample 6-QC1 | Sigma48                                       | 0                     | 20 fmol/uL   |
| Sample 6-QC2 | unspiked digested yeast                       | 60 ng/uL              | 0            |
| Sample 1-B   | digested NCI-20 protein mix                   |                       |              |
| Sample 6A    | 0.25 fmol/uL Sigma48 spiked into yeast digest | 60 ng/uL              | 0.25 fmol/uL |
| Sample 6B    | 0.74 fmol/uL Sigma48 spiked into yeast digest | 60 ng/uL              | 0.74 fmol/uL |
| Sample 6C    | 2.2 fmol/uL Sigma48 spiked into yeast digest  | 60 ng/uL              | 2.2 fmol/uL  |
| Sample 6D    | 6.7 fmol/uL Sigma48 spiked into yeast digest  | 60 ng/uL              | 6.7 fmol/uL  |
| Sample 6E    | 20 fmol/uL Sigma48 spiked into yeast digest   | 60 ng/uL              | 20 fmol/uL   |

An equimolar mixture of 48 human proteins (Sigma UPS1) was prepared for Study 6 as follows:

#### **TFE-assisted Digestion of Sigma 48**

1. Resuspend contents of a single Sigma 48 vial in:  
50 uL 100 mM ammonium bicarbonate pH 8  
50 uL TFE (Acros Organics)

Incubate at 60 °C for 45 minutes and vortex repeatedly. You'll see solid material "stuck" at the bottom of the vial so I simply vortex to try to get as much of this into solution.

2. Reduce (using 1/10 volume) with 10 uL of 50 mM DTT (prepared in water) and incubate at 55-66°C for 20 minutes.
3. Cool to room temperature and alkylate with 10 uL of 100 mM IAM (also prepared in water) and incubate in the dark for 20 minutes.
4. Dilute with enough volume of Ambic pH 8 (360 uL) so the final concentration of TFE is about ≤10 % prior to adding the trypsin.
5. Add trypsin (Promega) in 1:50 ratio. Our trypsin concentration is 0.01 ug/uL in 100 mM Ambic, and based on the average protein concentration of a Sigma 48 vial (around 6.5 ug) I added 20 uL of the 0.01 ug/uL trypsin stock.

Digest at 37 °C overnight, dry down and reconstitute in 0.1 % formic acid for LC/MS/MS analysis. I reconstituted in 50 uL = 100 fmol/uL

(Note: DTT and IAM were from Sigma.)

For Study 6, 1 vial of digested Sigma48 (Sample 6-QC1), 1 vial of digested, unspiked yeast (Sample 6-QC2), 1 vial of digested NCI 20 protein mix (Sample 1B) and 5 vials with varying concentrations of digested Sigma48



spiked into digested yeast (Samples 6A-6E) will be sent to each laboratory. Prior to analysis, **Sample 1B should be diluted 150-fold with 0.1% formic acid in water**. All other samples do not need be diluted.

Below are checklists that outline the HPLC and mass spectrometry parameters of this SOP for both a Thermo LTQ and Thermo Orbitrap. The run order for the samples follow the checklists.

If possible, participants should pack their columns at 1000 PSI in methanol and then finish packing with the HPLC at 50:50 0.1% formic:acetonitrile on the HPLC for 30 min prior to cutting back the columns to their final dimensions. The column should also be conditioned prior to use with an injection of a concentrated protein digest (such as a BSA digest) followed by several injections of a less concentrated digest. Several blank runs should be performed after conditioning to eliminate carryover of the conditioning digest into the first blank of the study.

## Study 6 LTQ SOP Checklist

| Source/APstack parameters |                                                     |  |              | Notes |
|---------------------------|-----------------------------------------------------|--|--------------|-------|
| <input type="checkbox"/>  | Capillary temperature                               |  | 150 ± 25°C   |       |
| <input type="checkbox"/>  | Capillary voltage                                   |  | 48 ± 20 V    |       |
| <input type="checkbox"/>  | Tube Lens                                           |  | 100 ± 25 V   |       |
| <input type="checkbox"/>  | Source voltage                                      |  | 2.0 ± 0.5 kV |       |
| Tune File Parameters      |                                                     |  |              | Notes |
| <input type="checkbox"/>  | Ion Trap Full Microscans                            |  | 1            |       |
| <input type="checkbox"/>  | Ion Trap MSn Microscans                             |  | 1            |       |
| <input type="checkbox"/>  | Ion Trap Full Max Ion Time                          |  | 100          |       |
| <input type="checkbox"/>  | Ion Trap MSn Max Ion Time                           |  | 100          |       |
| <input type="checkbox"/>  | Ion Trap Full AGC Target                            |  | 30,000       |       |
| <input type="checkbox"/>  | Ion Trap MSn AGC Target                             |  | 10,000       |       |
| MS detector               |                                                     |  |              | Notes |
| <input type="checkbox"/>  | Acquire time (min)                                  |  | 184          |       |
| <input type="checkbox"/>  | Start delay (min)                                   |  | 15           |       |
| <input type="checkbox"/>  | Segments                                            |  | 1            |       |
| <input type="checkbox"/>  | Scan Events                                         |  | 9            |       |
| <input type="checkbox"/>  | Scan Range for Event 1                              |  | m/z 300-2000 |       |
| <input type="checkbox"/>  | Mass range for all events                           |  | Normal       |       |
| <input type="checkbox"/>  | Scan Rate for all events                            |  | Normal       |       |
| <input type="checkbox"/>  | Polarity for all events                             |  | Positive     |       |
| <input type="checkbox"/>  | Data type for MS scan                               |  | Centroid     |       |
| <input type="checkbox"/>  | Data Type for MSn Scan                              |  | Centroid     |       |
| <input type="checkbox"/>  | Additional microscans                               |  | 0            |       |
| Dynamic Exclusion         |                                                     |  |              | Notes |
| <input type="checkbox"/>  | Repeat Count                                        |  | 1            |       |
| <input type="checkbox"/>  | Repeat duration (s)                                 |  | 0            |       |
| <input type="checkbox"/>  | Exclusion list size                                 |  | 150          |       |
| <input type="checkbox"/>  | Exclusion duration (s)                              |  | 60           |       |
| <input type="checkbox"/>  | Exclusion mass width                                |  | By mass      |       |
| <input type="checkbox"/>  | Exclusion mass width (low)                          |  | 1.0          |       |
| <input type="checkbox"/>  | Exclusion mass width (high)                         |  | 3.5          |       |
| <input type="checkbox"/>  | Early expiration is NOT used                        |  |              |       |
| Scan Event                |                                                     |  |              | Notes |
| <input type="checkbox"/>  | Charge state screening and Rejection is NOT enabled |  |              |       |
| <input type="checkbox"/>  | Minimum MS signal Threshold for MS2 trigger         |  | 500          |       |
| <input type="checkbox"/>  | Mass determined from scan event                     |  | 1            |       |

|                                           |                          |                                                                                                       |                                        |       |
|-------------------------------------------|--------------------------|-------------------------------------------------------------------------------------------------------|----------------------------------------|-------|
|                                           | <input type="checkbox"/> | Activation type                                                                                       | CID                                    |       |
|                                           | <input type="checkbox"/> | Default charge state                                                                                  | 4                                      |       |
|                                           | <input type="checkbox"/> | Isolation width (m/z)                                                                                 | 2.0                                    |       |
|                                           | <input type="checkbox"/> | Normalized collision energy                                                                           | 28                                     |       |
|                                           | <input type="checkbox"/> | Activation Q                                                                                          | 0.250                                  |       |
|                                           | <input type="checkbox"/> | Activation time (s)                                                                                   | 30.0                                   |       |
|                                           | <input type="checkbox"/> | Mass lists and global mass lists NOT used                                                             |                                        |       |
|                                           | <input type="checkbox"/> | Wideband Activation NOT used                                                                          |                                        |       |
|                                           | <input type="checkbox"/> | For each Current Scan Event, the Nth most intense ion is set at 8-1 for scan events 2-9, respectively |                                        |       |
| <b>HPLC Parameters and chromatography</b> |                          |                                                                                                       |                                        | Notes |
|                                           | <input type="checkbox"/> | Autosampler temperature                                                                               | 10C                                    |       |
|                                           | <input type="checkbox"/> | Column dimensions                                                                                     | 11-13 cm x 100 $\mu$ m*                |       |
|                                           | <input type="checkbox"/> | Precolumn dimensions                                                                                  | 2-4 cm x 100 $\mu$ m**                 |       |
|                                           | <input type="checkbox"/> | Column packing material                                                                               | Jupiter C18                            |       |
|                                           | <input type="checkbox"/> | Column temperature                                                                                    | Room temperature                       |       |
|                                           | <input type="checkbox"/> | Mobile phase A                                                                                        | 0.1% (v/v) formic acid in water        |       |
|                                           | <input type="checkbox"/> | Mobile phase B                                                                                        | 0.1% (v/v) formic acid in acetonitrile |       |
|                                           | <input type="checkbox"/> | Injection volume                                                                                      | 2.0 $\mu$ L                            |       |
|                                           | <input type="checkbox"/> | Injection loop (or needle) volume                                                                     | 8.0 $\mu$ L***                         |       |
|                                           | <input type="checkbox"/> | Flow rate for gradient                                                                                | 600 nL/min at column tip               |       |
|                                           | <input type="checkbox"/> | Flow rate for loading phase                                                                           | 1.2 $\mu$ L/min                        |       |
|                                           | <input type="checkbox"/> | 184 min HPLC gradient for yeast samples                                                               | As per attached table                  |       |
|                                           | <input type="checkbox"/> | 95 min HPLC gradient for NCI20 and blanks samples                                                     | As per attached table                  |       |

\* Column length may vary depending upon the individual nanospray set up, but inner diameter should remain the same.

\*\* Precolumn is optional depending upon individual laboratory expertise, but should be used if at all possible. Column length may vary depending upon the individual nanospray set up, but inner diameter should remain the same.

\*\*\* If not possible to achieve, use same set up as dress rehearsal and make note of change.

### 184 min HPLC Gradient with “vented” column for yeast samples

| Time  | %A  | %B | Flow path          | Flow rate  | Notes |
|-------|-----|----|--------------------|------------|-------|
| 0     | 100 | 0  | To Waste*          | 1.2 uL/min |       |
| 0.01  | 100 | 0  | To Waste           | 1.2 uL/min |       |
| 10    | 100 | 0  | To Waste           | 1.2 uL/min |       |
| 15    | 98  | 2  | To Waste           | 1.2 uL/min |       |
| 15.01 | 98  | 2  | To column (source) | 600 nL/min |       |
| 135   | 60  | 40 | To column (source) | 600 nL/min |       |
| 150   | 10  | 90 | To column (source) | 600 nL/min |       |
| 155   | 10  | 90 | To column (source) | 600 nL/min |       |
| 159   | 10  | 90 | To column (source) | 600 nL/min |       |
| 164   | 95  | 5  | To column (source) | 600 nL/min |       |
| 169   | 100 | 0  | To column (source) | 600 nL/min |       |
| 184   | 100 | 0  | To column (source) | 600 nL/min |       |

\*If using a precolumn, the flow should be directed to waste.

### 95 min HPLC Gradient with “vented” column for blanks and NCI-20

| Time  | %A  | %B | Flow               | Flow rate  | Notes |
|-------|-----|----|--------------------|------------|-------|
| 0     | 100 | 0  | To Waste*          | 1.2 uL/min |       |
| 0.01  | 100 | 0  | To Waste           | 1.2 uL/min |       |
| 10    | 100 | 0  | To Waste           | 1.2 uL/min |       |
| 15    | 98  | 2  | To Waste           | 1.2 uL/min |       |
| 15.01 | 98  | 2  | To column (source) | 600 nL/min |       |
| 50    | 75  | 25 | To column (source) | 600 nL/min |       |
| 65    | 10  | 90 | To column (source) | 600 nL/min |       |
| 70    | 10  | 90 | To column (source) | 600 nL/min |       |
| 74    | 10  | 90 | To column (source) | 600 nL/min |       |
| 75    | 95  | 5  | To column (source) | 600 nL/min |       |
| 80    | 100 | 0  | To column (source) | 600 nL/min |       |
| 95    | 100 | 0  | To column (source) | 600 nL/min |       |

\*If using a precolumn, the flow should be directed to waste.

## Run order:

This series of samples is to be run in **triplicate**. You may run the triplicate runs back-to-back or as three separate replicates with other samples or maintenance in between. If the series is run back-to-back, there is no need to run the Sample 1B (NCI20) two times in a row.

| <b>Run number</b> | <b>Sample</b>                                             | <b>Gradient</b>  |
|-------------------|-----------------------------------------------------------|------------------|
| 1                 | <b>Sample 1-B-NCI20</b>                                   | 95 min gradient  |
| 2                 | Wash*                                                     |                  |
| 3                 | Blank                                                     | 95 min gradient  |
| 4                 | <b>Sample 6-QC2 –Yeast only</b>                           | 184 min gradient |
| 5                 | Wash*                                                     |                  |
| 6                 | Blank                                                     | 95 min gradient  |
| 7                 | <b>Sample 6A - 0.25 fmol/uL<br/>Sigma 48 spiked yeast</b> | 184 min gradient |
| 8                 | Wash*                                                     |                  |
| 9                 | Blank                                                     | 95 min gradient  |
| 10                | <b>Sample 6B - 0.74 fmol/uL<br/>Sigma 48 spiked yeast</b> | 184 min gradient |
| 11                | Wash*                                                     |                  |
| 12                | Blank                                                     | 95 min gradient  |
| 13                | <b>Sample 6C - 2.2 fmol/uL<br/>Sigma 48 spiked yeast</b>  | 184 min gradient |
| 14                | Wash*                                                     |                  |
| 15                | Blank                                                     | 95 min gradient  |
| 16                | <b>Sample 6D - 6.7 fmol/uL<br/>Sigma 48 spiked yeast</b>  | 184 min gradient |
| 17                | Wash*                                                     |                  |
| 18                | Blank                                                     | 95 min gradient  |
| 19                | <b>Sample 6E - 20 fmol/uL<br/>Sigma 48 spiked yeast</b>   | 184 min gradient |
| 20                | Wash*                                                     |                  |
| 21                | Blank                                                     | 95 min gradient  |
| 22                | <b>Sample 6-QC1 - Sigma 48<br/>only</b>                   | 184 min gradient |
| 23                | Wash*                                                     |                  |
| 24                | Blank                                                     | 95 min gradient  |
| 25                | <b>Sample 1-B-NCI20</b>                                   | 95 min gradient  |

\* As per individual laboratory protocol

## Study 6 Orbitrap SOP Checklist

| Source/APstack parameters      |                                |  |              | Notes |
|--------------------------------|--------------------------------|--|--------------|-------|
| <input type="checkbox"/>       | Capillary temperature          |  | 150 ± 25°C   |       |
| <input type="checkbox"/>       | Capillary voltage              |  | 48 ± 20 V    |       |
| <input type="checkbox"/>       | Tube Lens                      |  | 100 ± 25 V   |       |
| <input type="checkbox"/>       | Source voltage                 |  | 2.0 ± 0.5 kV |       |
| Tune File Parameters           |                                |  |              | Notes |
| <input type="checkbox"/>       | FTMS Full Microscans           |  | 1            |       |
| <input type="checkbox"/>       | Ion Trap MSn Microscans        |  | 1            |       |
| <input type="checkbox"/>       | FTMS Full Max Ion Time         |  | 1000         |       |
| <input type="checkbox"/>       | Ion Trap MSn Max Ion Time      |  | 100          |       |
| <input type="checkbox"/>       | FTMS Full AGC Target           |  | 1,000,000    |       |
| <input type="checkbox"/>       | Ion Trap MSn AGC Target        |  | 10,000       |       |
| MS detector                    |                                |  |              | Notes |
| <input type="checkbox"/>       | Acquire time (min)             |  | 184          |       |
| <input type="checkbox"/>       | Start delay (min)              |  | 15           |       |
| <input type="checkbox"/>       | Segments                       |  | 1            |       |
| <input type="checkbox"/>       | Scan Events                    |  | 9            |       |
| <input type="checkbox"/>       | Scan Range for Event 1         |  | m/z 300-2000 |       |
| <input type="checkbox"/>       | Mass range for all events      |  | Normal       |       |
| <input type="checkbox"/>       | Scan Rate for all events       |  | Normal       |       |
| <input type="checkbox"/>       | Polarity for all events        |  | Positive     |       |
| <input type="checkbox"/>       | Data type for MS scan          |  | Profile      |       |
| <input type="checkbox"/>       | Data Type for MSn Scan         |  | Centroid     |       |
| <input type="checkbox"/>       | Additional microscans          |  | 0            |       |
| <input type="checkbox"/>       | Resolution of MS scan          |  | 60,000       |       |
| <input type="checkbox"/>       | Lock mass is NOT enabled       |  |              |       |
| Dynamic Exclusion              |                                |  |              | Notes |
| <input type="checkbox"/>       | Repeat Count                   |  | 1            |       |
| <input type="checkbox"/>       | Repeat duration (s)            |  | 0            |       |
| <input type="checkbox"/>       | Exclusion list size            |  | 150          |       |
| <input type="checkbox"/>       | Exclusion duration (s)         |  | 60           |       |
| <input type="checkbox"/>       | Exclusion mass width           |  | By mass      |       |
| <input type="checkbox"/>       | Exclusion mass width (low)     |  | 0.6          |       |
| <input type="checkbox"/>       | Exclusion mass width (high)    |  | 0.6          |       |
| <input type="checkbox"/>       | Early expiration is NOT used   |  |              |       |
| Global Data-Dependent Settings |                                |  |              | Notes |
| <input type="checkbox"/>       | Charge state screening enabled |  |              |       |
| <input type="checkbox"/>       | Monoisotopic precursor         |  |              |       |

|                                           |                          |                                                                                                       |                                        |              |
|-------------------------------------------|--------------------------|-------------------------------------------------------------------------------------------------------|----------------------------------------|--------------|
|                                           |                          | selection enabled                                                                                     |                                        |              |
|                                           | <input type="checkbox"/> | Non-peptide monoisotopic recognition enabled                                                          |                                        |              |
|                                           | <input type="checkbox"/> | Charge state +1 rejected                                                                              |                                        |              |
|                                           | <input type="checkbox"/> | Unassigned charge state rejected                                                                      |                                        |              |
| <b>Scan Event</b>                         |                          |                                                                                                       |                                        | <b>Notes</b> |
|                                           | <input type="checkbox"/> | Minimum MS signal Threshold for MS2 trigger                                                           | 500                                    |              |
|                                           | <input type="checkbox"/> | Mass determined from scan event                                                                       | 1                                      |              |
|                                           | <input type="checkbox"/> | Activation type                                                                                       | CID                                    |              |
|                                           | <input type="checkbox"/> | Default charge state                                                                                  | 4                                      |              |
|                                           | <input type="checkbox"/> | Isolation width (m/z)                                                                                 | 2.0                                    |              |
|                                           | <input type="checkbox"/> | Normalized collision energy                                                                           | 28                                     |              |
|                                           | <input type="checkbox"/> | Activation Q                                                                                          | 0.250                                  |              |
|                                           | <input type="checkbox"/> | Activation time (s)                                                                                   | 30.0                                   |              |
|                                           | <input type="checkbox"/> | Mass lists and global mass lists NOT used                                                             |                                        |              |
|                                           | <input type="checkbox"/> | Wideband Activation NOT used                                                                          |                                        |              |
|                                           | <input type="checkbox"/> | For each Current Scan Event, the Nth most intense ion is set at 8-1 for scan events 2-9, respectively |                                        |              |
| <b>HPLC Parameters and chromatography</b> |                          |                                                                                                       |                                        | <b>Notes</b> |
|                                           | <input type="checkbox"/> | Autosampler temperature                                                                               | 10C                                    |              |
|                                           | <input type="checkbox"/> | Column dimensions                                                                                     | 11-13 cm x 100 $\mu$ m*                |              |
|                                           | <input type="checkbox"/> | Precolumn dimensions                                                                                  | 2-4 cm x 100 $\mu$ m**                 |              |
|                                           | <input type="checkbox"/> | Column packing material                                                                               | Jupiter C18                            |              |
|                                           | <input type="checkbox"/> | Column temperature                                                                                    | Room temperature                       |              |
|                                           | <input type="checkbox"/> | Mobile phase A                                                                                        | 0.1% (v/v) formic acid in water        |              |
|                                           | <input type="checkbox"/> | Mobile phase B                                                                                        | 0.1% (v/v) formic acid in acetonitrile |              |
|                                           | <input type="checkbox"/> | Injection volume                                                                                      | 2.0 $\mu$ L                            |              |
|                                           | <input type="checkbox"/> | Injection loop (or needle) volume                                                                     | 8.0 $\mu$ L***                         |              |
|                                           | <input type="checkbox"/> | Flow rate for gradient                                                                                | 600 nL/min at column tip               |              |
|                                           | <input type="checkbox"/> | Flow rate for loading phase                                                                           | 1.2 uL/min                             |              |
|                                           | <input type="checkbox"/> | 184 min HPLC gradient for yeast samples                                                               | As per attached table                  |              |
|                                           | <input type="checkbox"/> | 95 min HPLC gradient for NCI20 and blanks samples                                                     | As per attached table                  |              |

\* Column length may vary depending upon the individual nanospray set up, but inner diameter should remain the same.

\*\* Precolumn is optional depending upon individual laboratory expertise, but should be used if at all possible. Column length may vary depending upon the individual nanospray set up, but inner diameter should remain the same.

\*\*\* If not possible, use same set up as dress rehearsal and make note of change.

| <b>184 min HPLC Gradient with “vented” column for yeast samples</b> |     |    |                    |            |       |
|---------------------------------------------------------------------|-----|----|--------------------|------------|-------|
| Time                                                                | %A  | %B | Flow path          | Flow rate  | Notes |
| 0                                                                   | 100 | 0  | To Waste*          | 1.2 uL/min |       |
| 0.01                                                                | 100 | 0  | To Waste           | 1.2 uL/min |       |
| 10                                                                  | 100 | 0  | To Waste           | 1.2 uL/min |       |
| 15                                                                  | 98  | 2  | To Waste           | 1.2 uL/min |       |
| 15.01                                                               | 98  | 2  | To column (source) | 600 nL/min |       |
| 135                                                                 | 60  | 40 | To column (source) | 600 nL/min |       |
| 150                                                                 | 10  | 90 | To column (source) | 600 nL/min |       |
| 155                                                                 | 10  | 90 | To column (source) | 600 nL/min |       |
| 159                                                                 | 10  | 90 | To column (source) | 600 nL/min |       |
| 164                                                                 | 95  | 5  | To column (source) | 600 nL/min |       |
| 169                                                                 | 100 | 0  | To column (source) | 600 nL/min |       |
| 184                                                                 | 100 | 0  | To column (source) | 600 nL/min |       |

\*If using a precolumn, the flow should be directed to waste.

| <b>95 min HPLC Gradient with “vented” column for blanks and NCI-20</b> |     |    |                    |            |       |
|------------------------------------------------------------------------|-----|----|--------------------|------------|-------|
| Time                                                                   | %A  | %B | Flow               | Flow rate  | Notes |
| 0                                                                      | 100 | 0  | To Waste*          | 1.2 uL/min |       |
| 0.01                                                                   | 100 | 0  | To Waste           | 1.2 uL/min |       |
| 10                                                                     | 100 | 0  | To Waste           | 1.2 uL/min |       |
| 15                                                                     | 98  | 2  | To Waste           | 1.2 uL/min |       |
| 15.01                                                                  | 98  | 2  | To column (source) | 600 nL/min |       |
| 50                                                                     | 75  | 25 | To column (source) | 600 nL/min |       |
| 65                                                                     | 10  | 90 | To column (source) | 600 nL/min |       |
| 70                                                                     | 10  | 90 | To column (source) | 600 nL/min |       |
| 74                                                                     | 10  | 90 | To column (source) | 600 nL/min |       |
| 75                                                                     | 95  | 5  | To column (source) | 600 nL/min |       |
| 80                                                                     | 100 | 0  | To column (source) | 600 nL/min |       |
| 95                                                                     | 100 | 0  | To column (source) | 600 nL/min |       |

\*If using a precolumn, the flow should be directed to waste.



## Run order:

This series of samples is to be run in **triplicate**. You may run the triplicate runs back-to-back or as three separate replicates with other samples or maintenance in between. If the series is run back-to-back, there is no need to run the Sample 1B (NCI20) two times in a row.

| <b>Run number</b> | <b>Sample</b>                                             | <b>Gradient</b>  |
|-------------------|-----------------------------------------------------------|------------------|
| 1                 | <b>Sample 1-B-NCI20</b>                                   | 95 min gradient  |
| 2                 | Wash*                                                     |                  |
| 3                 | Blank                                                     | 95 min gradient  |
| 4                 | <b>Sample 6-QC2 –Yeast only</b>                           | 184 min gradient |
| 5                 | Wash*                                                     |                  |
| 6                 | Blank                                                     | 95 min gradient  |
| 7                 | <b>Sample 6A - 0.25 fmol/uL<br/>Sigma 48 spiked yeast</b> | 184 min gradient |
| 8                 | Wash*                                                     |                  |
| 9                 | Blank                                                     | 95 min gradient  |
| 10                | <b>Sample 6B - 0.74 fmol/uL<br/>Sigma 48 spiked yeast</b> | 184 min gradient |
| 11                | Wash*                                                     |                  |
| 12                | Blank                                                     | 95 min gradient  |
| 13                | <b>Sample 6C - 2.2 fmol/uL<br/>Sigma 48 spiked yeast</b>  | 184 min gradient |
| 14                | Wash*                                                     |                  |
| 15                | Blank                                                     | 95 min gradient  |
| 16                | <b>Sample 6D - 6.7 fmol/uL<br/>Sigma 48 spiked yeast</b>  | 184 min gradient |
| 17                | Wash*                                                     |                  |
| 18                | Blank                                                     | 95 min gradient  |
| 19                | <b>Sample 6E - 20 fmol/uL<br/>Sigma 48 spiked yeast</b>   | 184 min gradient |
| 20                | Wash*                                                     |                  |
| 21                | Blank                                                     | 95 min gradient  |
| 22                | <b>Sample 6-QC1 - Sigma 48<br/>only</b>                   | 184 min gradient |
| 23                | Wash*                                                     |                  |
| 24                | Blank                                                     | 95 min gradient  |
| 25                | <b>Sample 1-B-NCI20</b>                                   | 95 min gradient  |

\* As per individual laboratory protocol
